# Supplementary material for: Machine Learning CT-Based Automatic Nodal Segmentation and PET Semi-Quantification of Intraoperative 68Ga-PSMA-11 PET/CT Images in High-Risk Prostate Cancer: A Pilot Study
Source: MDPI journal article supplement (doi:10.3390/diagnostics13183013), 2023-09-21

- Manual segmentation
- Automatic segmentation
- Voxel with highest tracer uptake
- Voxel with second-highest tracer uptake

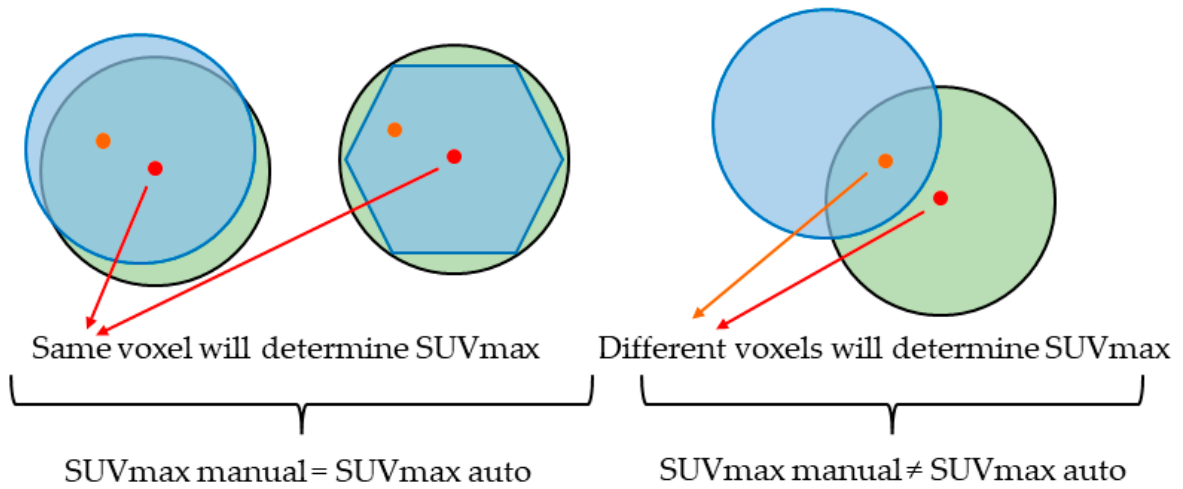

Supplement: s1 [file s1]
